# Supplementary material
Source: PubMed Central journal article supplement (PMC2889116)
Supplement: 0914004107_sfig06.pdf [file 0914004107_sfig06.pdf]

Wang et al. Figure S6

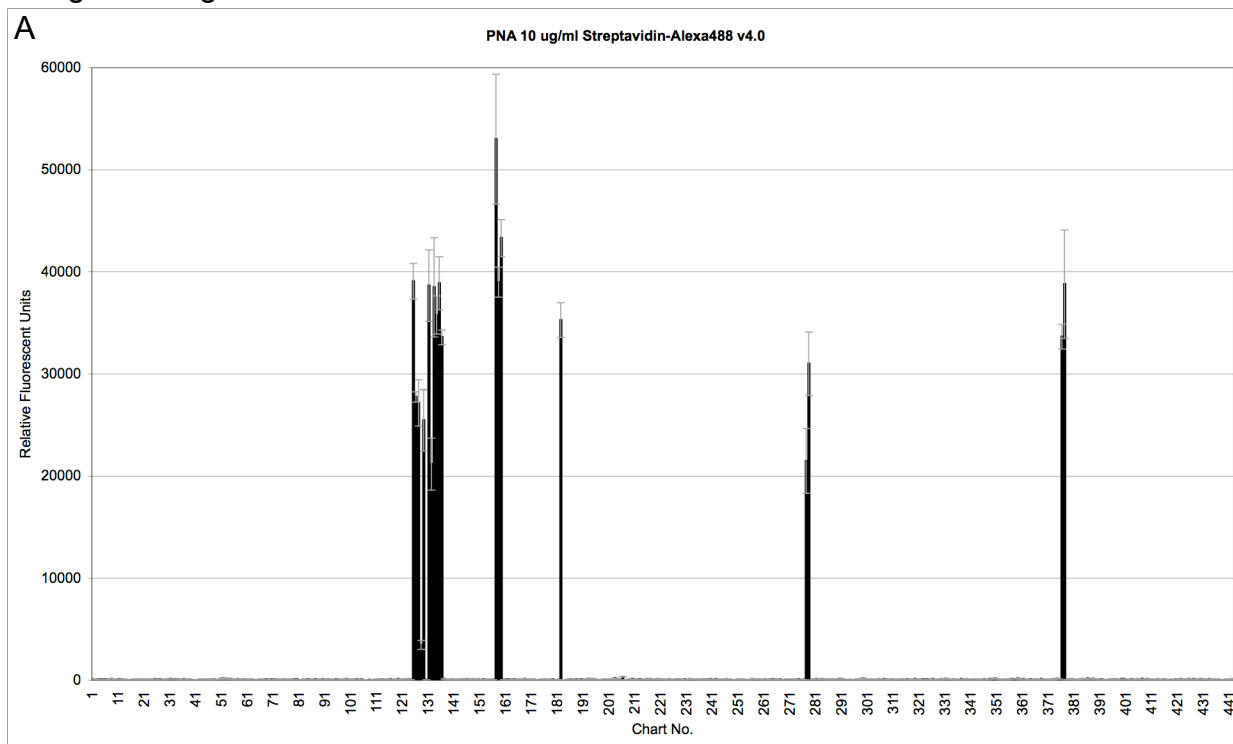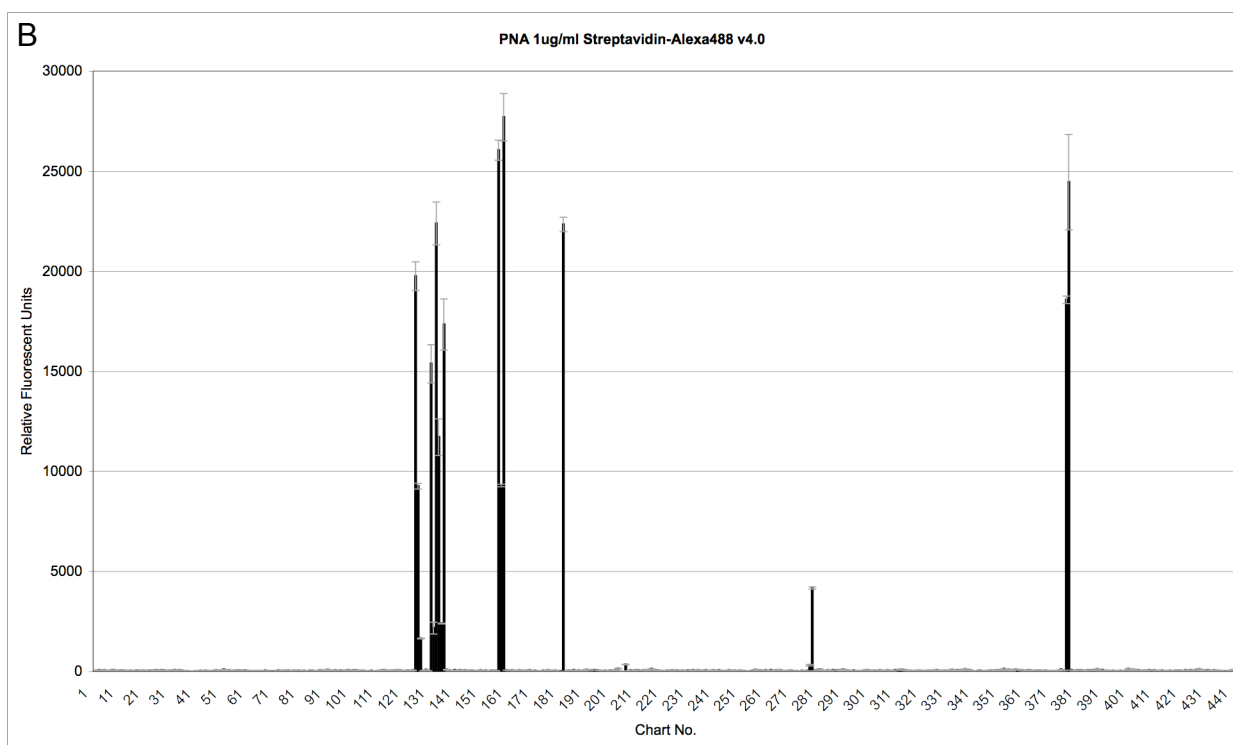

C

## PNA 10 ug/ml Streptavidin-Alexa488 v4.0

| Chart Number | Structure                                                                                               | RFU          | STDEV | SEM  | %CV |
|--------------|---------------------------------------------------------------------------------------------------------|--------------|-------|------|-----|
| 157          | Galb1-4GlcNAcb1-6( <b>Galb1-3</b> )GalNAca-Sp8                                                          | <b>52982</b> | 12713 | 6356 | 24  |
| 159          | <b>Galb1-3</b> (Galb1-4GlcNAcb1-6)GalNAc-Sp14                                                           | <b>43294</b> | 3617  | 1809 | 8   |
| 125          | <b>Galb1-3</b> (GlcNAcb1-6)GalNAca-Sp8                                                                  | <b>39068</b> | 3479  | 1739 | 9   |
| 158          | <b>Galb1-3</b> (Galb1-4GlcNAcb1-6)GalNAca-Sp8                                                           | <b>38992</b> | 2941  | 1470 | 8   |
| 135          | <b>Galb1-3GalNAcb1-4</b> (Neu5Aca2-3)Galb1-4Glc-Sp0                                                     | <b>38861</b> | 5200  | 2600 | 13  |
| 377          | <b>Galb1-3GalNAca1-3</b> (Fuca1-2)Galb1-4GlcNAc-Sp0                                                     | <b>38795</b> | 10613 | 5306 | 27  |
| 131          | <b>Galb1-3GalNAca-Sp8</b>                                                                               | <b>38639</b> | 7020  | 3510 | 18  |
| 133          | <b>Galb1-3GalNAcb-Sp8</b>                                                                               | <b>38479</b> | 9722  | 4861 | 25  |
| 134          | <b>Galb1-3GalNAcb1-3Gala1-4Galb1-4Glc-Sp0</b>                                                           | <b>35763</b> | 3735  | 1867 | 10  |
| 182          | GlcNAcb1-6( <b>Galb1-3</b> )GalNAca-Sp8                                                                 | <b>35262</b> | 3403  | 1701 | 10  |
| 376          | <b>Galb1-3GalNAca1-3</b> (Fuca1-2)Galb1-4Glc-Sp0                                                        | <b>33645</b> | 2428  | 1214 | 7   |
| 136          | <b>Galb1-3GalNAcb1-4Galb1-4Glc-Sp8</b>                                                                  | <b>33579</b> | 1428  | 714  | 4   |
| 278          | <b>Galb1-3GalNAca-Sp14</b>                                                                              | <b>30977</b> | 6217  | 3109 | 20  |
| 126          | <b>Galb1-3</b> (GlcNAcb1-6)GalNAc-Sp14                                                                  | <b>27750</b> | 1023  | 511  | 4   |
| 127          | <b>Galb1-3</b> (Neu5Aca2-6)GalNAca-Sp8                                                                  | <b>27165</b> | 4547  | 2274 | 17  |
| 129          | <b>Galb1-3</b> (Neu5Acb2-6)GalNAca-Sp8                                                                  | <b>25462</b> | 6000  | 3000 | 24  |
| 277          | <b>Galb1-3</b> (Neu5Aca2-3Galb1-4GlcNAcb1-6)GalNAca-Sp14                                                | <b>21482</b> | 6348  | 3174 | 30  |
| 132          | <b>Galb1-3GalNAca-Sp16</b>                                                                              | <b>21154</b> | 5070  | 2535 | 24  |
| 128          | <b>Galb1-3</b> (Neu5Aca2-6)GalNAca-Sp14                                                                 | <b>3453</b>  | 881   | 441  | 26  |
| 206          | Mana1-6(Mana1-3)Mana1-6[Mana1-2Mana1-3]Manb1-4GlcNAcb1-4GlcNAcb-Sp12                                    | 317          | 34    | 17   | 11  |
| 203          | Mana1-2Mana1-2Mana1-3(Mana1-2Mana1-3(Mana1-2Mana1-6)Mana1-6)Manb1-4GlcNAcb1-4GlcNAcb-Sp12               | 195          | 30    | 15   | 16  |
| 51           | Neu5Aca2-6Galb1-4GlcNAcb1-2Mana1-3(Neu5Aca2-6Galb1-4GlcNAcb1-2Mana1-6)Manb1-4GlcNAcb1-4GlcNAcb-N(LT)AVL | 195          | 47    | 24   | 24  |
| 350          | Galb1-3(Fuca1-4)GlcNAcb1-2Mana1-3(Galb1-3(Fuca1-4)GlcNAcb1-2Mana1-6)Manb1-4GlcNAcb1-4GlcNAcb-Sp19       | 181          | 56    | 28   | 31  |
| 52           | Neu5Aca2-6Galb1-4GlcNAcb1-2Mana1-3(Neu5Aca2-6Galb1-4GlcNAcb1-2Mana1-6)Manb1-4GlcNAcb1-4GlcNAcb-Sp8      | 176          | 68    | 34   | 39  |
| 386          | Fuca1-2Galb1-3GalNAca1-3(Fuca1-2)Galb1-4GlcNAcb-Sp0                                                     | 169          | 13    | 7    | 8   |
| 299          | GlcAb1-3GlcNAcb-Sp8                                                                                     | 167          | 36    | 18   | 21  |
| 359          | Gala1-3Galb1-4GlcNAcb1-2Mana1-3(Gala1-3Galb1-4GlcNAcb1-2Mana1-6)Manb1-4GlcNAcb1-4GlcNAcb-Sp20           | 156          | 31    | 16   | 20  |

## D

## PNA 1ug/ml Streptavidin-Alexa488 v4.0

| Chart Number | Structure                                                                                       | RFU          | STDEV | SEM  | %CV |
|--------------|-------------------------------------------------------------------------------------------------|--------------|-------|------|-----|
| 159          | <b>Galb1-3(Galb1-4GlcNAcb1-6)GalNAc</b> -Sp14                                                   | <b>27697</b> | 2377  | 1188 | 9   |
| 157          | Galb1-4GlcNAcb1-6( <b>Galb1-3</b> )GalNAca-Sp8                                                  | <b>26049</b> | 1001  | 501  | 4   |
| 377          | <b>Galb1-3GalNAca</b> 1-3(Fuca1-2)Galb1-4GlcNAc-Sp0                                             | <b>24450</b> | 4764  | 2382 | 19  |
| 133          | <b>Galb1-3GalNAcb</b> -Sp8                                                                      | <b>22386</b> | 2148  | 1074 | 10  |
| 182          | GlcNAcb1-6( <b>Galb1-3</b> )GalNAca-Sp8                                                         | <b>22337</b> | 719   | 359  | 3   |
| 125          | <b>Galb1-3(GlcNAcb1-6)GalNAca</b> -Sp8                                                          | <b>19750</b> | 1436  | 718  | 7   |
| 376          | <b>Galb1-3GalNAca</b> 1-3(Fuca1-2)Galb1-4Glc-Sp0                                                | <b>18571</b> | 378   | 189  | 2   |
| 136          | <b>Galb1-3GalNAcb</b> 1-4Galb1-4Glc-Sp8                                                         | <b>17332</b> | 2563  | 1282 | 15  |
| 131          | <b>Galb1-3GalNAca</b> -Sp8                                                                      | <b>15376</b> | 1909  | 954  | 12  |
| 134          | <b>Galb1-3GalNAcb</b> 1-3Gala1-4Galb1-4Glc-Sp0                                                  | <b>11714</b> | 1826  | 913  | 16  |
| 158          | <b>Galb1-3(Galb1-4GlcNAcb1-6)GalNAca</b> -Sp8                                                   | <b>9299</b>  | 127   | 63   | 1   |
| 126          | <b>Galb1-3(GlcNAcb1-6)GalNAc</b> -Sp14                                                          | <b>9253</b>  | 291   | 145  | 3   |
| 278          | <b>Galb1-3GalNAca</b> -Sp14                                                                     | <b>4169</b>  | 104   | 52   | 2   |
| 135          | <b>Galb1-3GalNAcb</b> 1-4(Neu5Aca2-3)Galb1-4Glc-Sp0                                             | <b>2398</b>  | 43    | 21   | 2   |
| 132          | <b>Galb1-3GalNAca</b> -Sp16                                                                     | <b>2165</b>  | 596   | 298  | 28  |
| 127          | <b>Galb1-3(Neu5Aca2-6)GalNAca</b> -Sp8                                                          | <b>1648</b>  | 36    | 18   | 2   |
| 206          | Mana1-6(Mana1-3)Mana1-6[Mana1-2Mana1-3]Manb1-4GlcNAcb1-4GlcNAcb-Sp12                            | 347          | 26    | 13   | 7   |
| 277          | <b>Galb1-3(Neu5Aca2-3Galb1-4GlcNAcb1-6)GalNAca</b> -Sp14                                        | <b>315</b>   | 71    | 35   | 22  |
| 203          | Mana1-2Mana1-2Mana1-3(Mana1-2Mana1-3(Mana1-2Mana1-6)Mana1-6)Manb1-4GlcNAcb1-4GlcNAcb-Sp12       | 137          | 30    | 15   | 22  |
| 216          | Neu5Aca2-8Neu5Aca2-8Neu5Aca2-3(GalNAcb1-4)Galb1-4Glc-Sp0                                        | 125          | 21    | 11   | 17  |
| 352          | KDNA2-3Galb1-4(Fuca1-3)GlcNAc-Sp0                                                               | 123          | 27    | 13   | 22  |
| 400          | Gala1-4Galb1-4GlcNacb1-2Mana1-3(Gala1-4Galb1-4GlcNacb1-2Mana1-6)Manb1-4GlcNacb1-4GlcNacb-LVaNKT | 122          | 45    | 22   | 36  |
| 427          | Galb1-4GlcNAcb1-3Galb1-4(Fuca1-3GlcNAcb1-6)Galb1-4Glc-Sp21                                      | 121          | 19    | 10   | 16  |
| 388          | Neu5Aca2-3(GalNAcb1-4)Galb1-4GlcNAcb1-3GalNAca-Sp14                                             | 121          | 22    | 11   | 18  |
| 337          | GlcNAca1-4Galb1-4GlcNAcb1-3Galb1-4(Fuca1-3)GlcNAcb1-3Galb1-4(Fuca1-3)GlcNAcb-Sp0                | 116          | 33    | 16   | 28  |
| 281          | Galb1-4(Fuca1-3)[6OSO3]Glc-Sp0                                                                  | 107          | 30    | 15   | 28  |

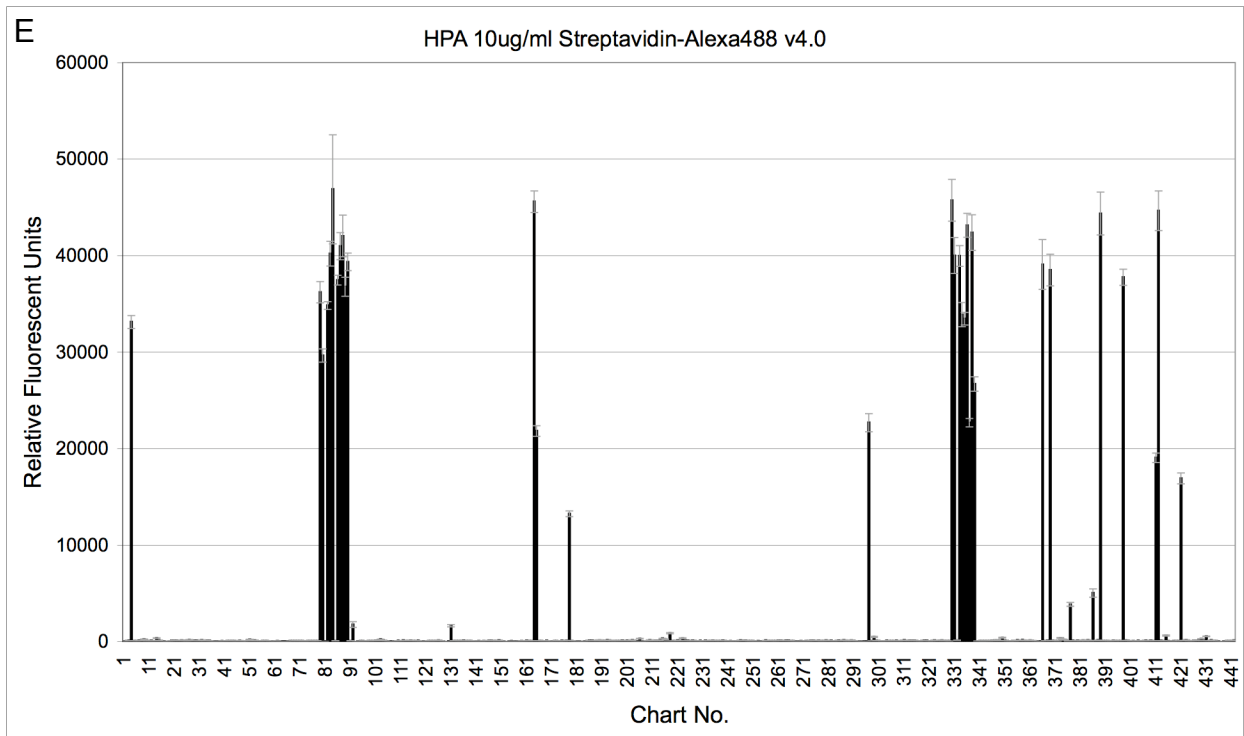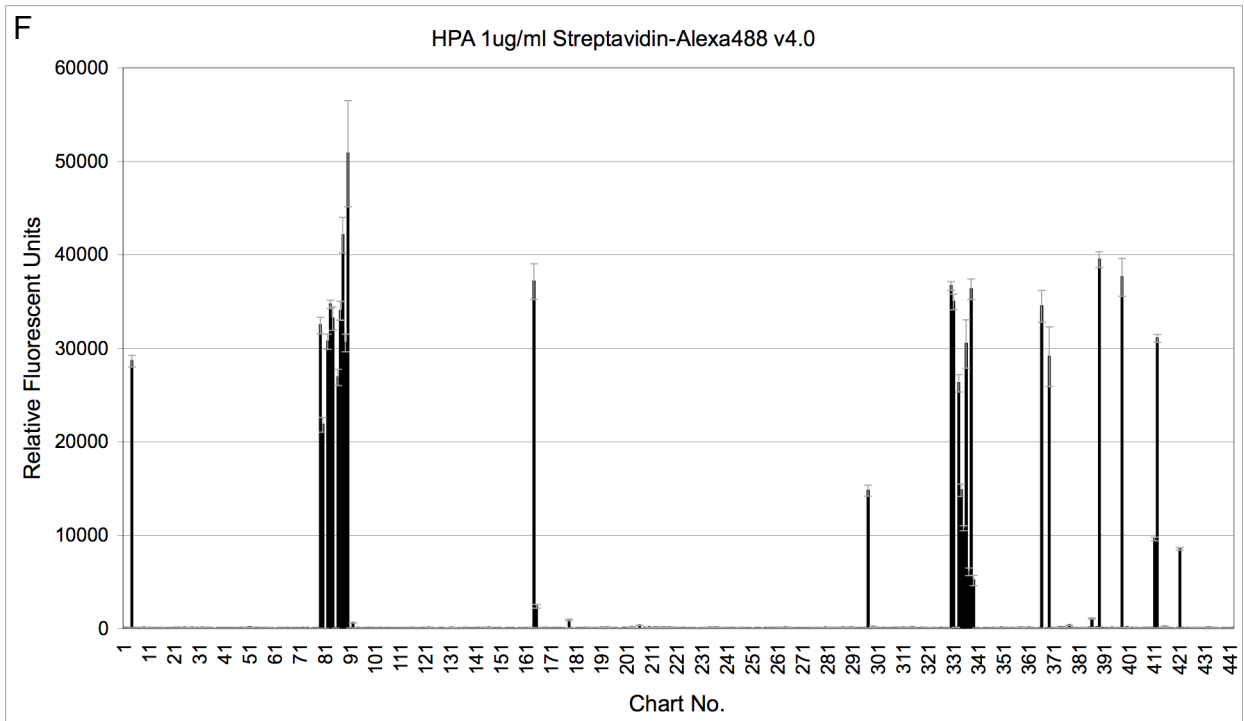

## G

## HPA 10ug/ml Streptavidin-Alexa488 v4.0

| Chart Number | Structure                                                                                                                     | RFU          | STDEV | SEM  | %CV |
|--------------|-------------------------------------------------------------------------------------------------------------------------------|--------------|-------|------|-----|
| 84           | <b>GalNAca1-3(Fuca1-2)Galb1-4Glc</b> -Sp0                                                                                     | <b>46874</b> | 11300 | 5650 | 24  |
| 330          | <b>GalNAca1-3(Fuca1-2)Galb1-4GlcNAcb1-3Galb1-4GlcNAcb</b> -Sp0                                                                | <b>45727</b> | 4333  | 2166 | 9   |
| 164          | GlcNAca1-3Galb1-4GlcNAcb-Sp8                                                                                                  | 45585        | 2246  | 1123 | 5   |
| 412          | <b>GalNAca1-3GalNAcb1-3Gala1-4Galb1-4Glc</b> -Sp0                                                                             | <b>44643</b> | 4133  | 2066 | 9   |
| 389          | <b>GalNAca1-3(Fuca1-2)Galb1-3GalNAca1-3(Fuca1-2)Galb1-4GlcNAcb</b> -Sp0                                                       | <b>44350</b> | 4444  | 2222 | 10  |
| 336          | GlcNAca1-4Galb1-4GlcNAcb1-3Galb1-4Glc-Sp0                                                                                     | 43136        | 2500  | 1250 | 6   |
| 338          | GlcNAca1-4Galb1-4GlcNAcb1-3Galb1-4GlcNAcb-Sp0                                                                                 | 42373        | 3719  | 1860 | 9   |
| 88           | <b>GalNAca1-3GalNAcb</b> -Sp8                                                                                                 | <b>42022</b> | 4320  | 2160 | 10  |
| 87           | <b>GalNAca1-3(Fuca1-2)Galb</b> -Sp18                                                                                          | <b>40981</b> | 2808  | 1404 | 7   |
| 83           | <b>GalNAca1-3(Fuca1-2)Galb1-4GlcNAcb</b> -Sp8                                                                                 | <b>40207</b> | 2566  | 1283 | 6   |
| 331          | <b>GalNAca1-3(Fuca1-2)Galb1-4GlcNAcb1-3Galb1-4GlcNAcb1-3Galb1-4GlcNAcb</b> -Sp0                                               | <b>39999</b> | 3714  | 1857 | 9   |
| 333          | GlcNAca1-4Galb1-4GlcNAcb1-3Galb1-4GlcNAcb1-3Galb1-4GlcNAcb-Sp0                                                                | 39971        | 2141  | 1071 | 5   |
| 90           | <b>GalNAca1-4(Fuca1-2)Galb1-4GlcNAcb</b> -Sp8                                                                                 | <b>39342</b> | 1815  | 907  | 5   |
| 366          | <b>GalNAca1-3(Fuca1-2)Galb1-4GlcNAcb1-2Mana1-3(GalNAca1-3(Fuca1-2)Galb1-4GlcNAcb1-2Mana1-6)Manb1-4GlcNAcb1-4GlcNAcb</b> -Sp20 | <b>39069</b> | 5163  | 2582 | 13  |
| 369          | <b>GalNAca1-3(Fuca1-2)Galb1-3GlcNAcb1-2Mana1-3(GalNAca1-3(Fuca1-2)Galb1-3GlcNAcb1-2Mana1-6)Manb1-4GlcNAcb1-4GlcNAcb</b> -Sp20 | <b>38504</b> | 3274  | 1637 | 9   |
| 398          | <b>GalNaca1-3GalNacb1-3Gala1-4Galb1-4GlcNacb</b> -Sp0                                                                         | <b>37753</b> | 1671  | 836  | 4   |
| 86           | <b>GalNAca1-3(Fuca1-2)Galb</b> -Sp8                                                                                           | <b>37447</b> | 1003  | 502  | 3   |
| 89           | <b>GalNAca1-3Galb</b> -Sp8                                                                                                    | <b>36762</b> | 1983  | 992  | 5   |
| 79           | <b>GalNAca1-3(Fuca1-2)Galb1-3GlcNAcb</b> -Sp0                                                                                 | <b>36193</b> | 2217  | 1109 | 6   |
| 82           | <b>GalNAca1-3(Fuca1-2)Galb1-4GlcNAcb</b> -Sp0                                                                                 | <b>34825</b> | 797   | 399  | 2   |
| 334          | GlcNAca1-4Galb1-4GlcNAcb-Sp0                                                                                                  | 33868        | 2513  | 1257 | 7   |
| 335          | GlcNAca1-4Galb1-3GlcNAcb-Sp0                                                                                                  | 33455        | 1315  | 658  | 4   |
| 4            | <b>GalNAca</b> -Sp8                                                                                                           | <b>33124</b> | 1335  | 667  | 4   |
| 80           | <b>GalNAca1-3(Fuca1-2)Galb1-4(Fuca1-3)GlcNAcb</b> -Sp0                                                                        | <b>29650</b> | 1361  | 680  | 5   |
| 339          | GlcNAca1-4Galb1-3GalNAc-Sp14                                                                                                  | 26687        | 1498  | 749  | 6   |
| 297          | <b>GalNAca</b> -Sp15                                                                                                          | <b>22682</b> | 1899  | 949  | 8   |
| 337          | GlcNAca1-4Galb1-4GlcNAcb1-3Galb1-4(Fuca1-3)GlcNAcb1-3Galb1-4(Fuca1-3)GlcNAcb-Sp0                                              | 22679        | 870   | 435  | 4   |
| 165          | GlcNAca1-6Galb1-4GlcNAcb-Sp8                                                                                                  | 21820        | 1098  | 549  | 5   |
| 411          | <b>GalNAca1-3(Fuca1-2)Galb1-4GlcNAcb1-3GalNAca</b> -Sp14                                                                      | <b>19043</b> | 972   | 486  | 5   |
| 421          | <b>GalNAca1-3(Fuca1-2)Galb1-3GlcNAcb1-3GalNAc</b> -Sp14                                                                       | <b>16913</b> | 1119  | 560  | 7   |
| 178          | GlcNAcb1-4Galb1-4GlcNAcb-Sp8                                                                                                  | 13240        | 608   | 304  | 5   |
| 386          | Fuca1-2Galb1-3 <b>GalNAca1-3(Fuca1-2)Galb1-4GlcNAcb</b> -Sp0                                                                  | 5026         | 859   | 429  | 17  |
| 377          | Galb1-3 <b>GalNAca1-3(Fuca1-2)Galb1-4GlcNAc</b> -Sp0                                                                          | 3858         | 403   | 201  | 10  |
| 92           | <b>GalNAcb1-3(Fuca1-2)Galb</b> -Sp8                                                                                           | <b>1760</b>  | 581   | 290  | 33  |
| 131          | Galb1-3 <b>GalNAca</b> -Sp8                                                                                                   | 1644         | 245   | 122  | 15  |
| 218          | Neu5Aca2-8Neu5Aca2-3( <b>GalNAcb1-4</b> )Galb1-4Glc-Sp0                                                                       | 862          | 110   | 55   | 13  |
| 415          | <b>GalNAca1-3(Fuca1-2)Galb1-4(Fuca1-3)GlcNAcb1-3GalNAc</b> -Sp14                                                              | 614          | 121   | 60   | 20  |
| 431          | GlcNAcb1-4(GlcNAcb1-2)Mana1-3(GlcNAcb1-4)(GlcNAcb1-6(GlcNAcb1-2)Mana1-6)Manb1-4GlcNAcb1-4GlcNAc-Sp21                          | 530          | 46    | 23   | 9   |
| 299          | GlcAb1-3GlcNAcb-Sp8                                                                                                           | 474          | 112   | 56   | 24  |
| 350          | Galb1-3(Fuca1-4)GlcNAcb1-2Mana1-3(Galb1-3(Fuca1-4)GlcNAcb1-2Mana1-6)Manb1-4GlcNAcb1-4GlcNAcb-Sp19                             | 402          | 65    | 32   | 16  |
| 373          | Neu5Aca2-6Galb1-4GlcNAcb1-3GalNAc-Sp14                                                                                        | 372          | 72    | 36   | 19  |

## H

## HPA 1ug/ml Streptavidin-Alexa488 v4.0

| Chart Number | Structure                                                                                                                    | RFU          | STDEV | SEM  | %CV |
|--------------|------------------------------------------------------------------------------------------------------------------------------|--------------|-------|------|-----|
| 90           | <b>GalNAca1-4(Fuca1-2)Galb1-4GlcNAcb-Sp8</b>                                                                                 | <b>50800</b> | 11368 | 5684 | 22  |
| 88           | <b>GalNAca1-3GalNAcb-Sp8</b>                                                                                                 | <b>42082</b> | 3796  | 1898 | 9   |
| 389          | <b>GalNAca1-3(Fuca1-2)Galb1-3GalNAca1-3(Fuca1-2)Galb1-4GlcNAcb-Sp0</b>                                                       | <b>39470</b> | 1701  | 851  | 4   |
| 398          | <b>GalNAca1-3GalNAcb1-3Gala1-4Galb1-4GlcNAcb-Sp0</b>                                                                         | <b>37567</b> | 4058  | 2029 | 11  |
| 164          | GlcNAca1-3Galb1-4GlcNAcb-Sp8                                                                                                 | 37107        | 3810  | 1905 | 10  |
| 330          | <b>GalNAca1-3(Fuca1-2)Galb1-4GlcNAcb1-3Galb1-4GlcNAcb-Sp0</b>                                                                | <b>36634</b> | 941   | 470  | 3   |
| 338          | GlcNAca1-4Galb1-4GlcNAcb1-3Galb1-4GlcNAcb-Sp0                                                                                | 36301        | 2183  | 1092 | 6   |
| 331          | <b>GalNAca1-3(Fuca1-2)Galb1-4GlcNAcb1-3Galb1-4GlcNAcb1-3Galb1-4GlcNAcb-Sp0</b>                                               | <b>34934</b> | 1680  | 840  | 5   |
| 83           | <b>GalNAca1-3(Fuca1-2)Galb1-4GlcNAcb-Sp8</b>                                                                                 | <b>34678</b> | 930   | 465  | 3   |
| 366          | <b>GalNAca1-3(Fuca1-2)Galb1-4GlcNAcb1-2Mana1-3(GalNAca1-3(Fuca1-2)Galb1-4GlcNAcb1-2Mana1-6)Manb1-4GlcNAcb1-4GlcNAcb-Sp20</b> | <b>34486</b> | 3394  | 1697 | 10  |
| 87           | <b>GalNAca1-3(Fuca1-2)Galb-Sp18</b>                                                                                          | <b>33984</b> | 2060  | 1030 | 6   |
| 84           | <b>GalNAca1-3(Fuca1-2)Galb1-4Glc-Sp0</b>                                                                                     | <b>33162</b> | 2516  | 1258 | 8   |
| 79           | <b>GalNAca1-3(Fuca1-2)Galb1-3GlcNAcb-Sp0</b>                                                                                 | <b>32424</b> | 1775  | 888  | 5   |
| 412          | <b>GalNAca1-3GalNAcb1-3Gala1-4Galb1-4Glc-Sp0</b>                                                                             | <b>31037</b> | 852   | 426  | 3   |
| 82           | <b>GalNAca1-3(Fuca1-2)Galb1-4GlcNAcb-Sp0</b>                                                                                 | <b>30662</b> | 1628  | 814  | 5   |
| 89           | <b>GalNAca1-3Galb-Sp8</b>                                                                                                    | <b>30550</b> | 1879  | 940  | 6   |
| 336          | GlcNAca1-4Galb1-4GlcNAcb1-3Galb1-4Glc-Sp0                                                                                    | 30442        | 5181  | 2591 | 17  |
| 369          | <b>GalNAca1-3(Fuca1-2)Galb1-3GlcNAcb1-2Mana1-3(GalNAca1-3(Fuca1-2)Galb1-3GlcNAcb1-2Mana1-6)Manb1-4GlcNAcb1-4GlcNAcb-Sp20</b> | <b>29066</b> | 6404  | 3202 | 22  |
| 4            | <b>GalNAca-Sp8</b>                                                                                                           | <b>28606</b> | 1258  | 629  | 4   |
| 86           | <b>GalNAca1-3(Fuca1-2)Galb-Sp8</b>                                                                                           | <b>26865</b> | 1722  | 861  | 6   |
| 333          | GlcNAca1-4Galb1-4GlcNAcb1-3Galb1-4GlcNAcb1-3Galb1-4GlcNAcb-Sp0                                                               | 26234        | 1850  | 925  | 7   |
| 80           | <b>GalNAca1-3(Fuca1-2)Galb1-4(Fuca1-3)GlcNAcb-Sp0</b>                                                                        | <b>21782</b> | 1581  | 790  | 7   |
| 334          | GlcNAca1-4Galb1-4GlcNAcb-Sp0                                                                                                 | 14776        | 1316  | 658  | 9   |
| 297          | <b>GalNAca-Sp15</b>                                                                                                          | <b>14740</b> | 1140  | 570  | 8   |
| 335          | GlcNAca1-4Galb1-3GlcNAcb-Sp0                                                                                                 | 10718        | 533   | 267  | 5   |
| 411          | <b>GalNAca1-3(Fuca1-2)Galb1-4GlcNAcb1-3GalNAca-Sp14</b>                                                                      | <b>9571</b>  | 381   | 190  | 4   |
| 421          | <b>GalNAca1-3(Fuca1-2)Galb1-3GlcNAcb1-3GalNAc-Sp14</b>                                                                       | <b>8535</b>  | 286   | 143  | 3   |
| 337          | GlcNAca1-4Galb1-4GlcNAcb1-3Galb1-4(Fuca1-3)GlcNAcb1-3Galb1-4(Fuca1-3)GlcNAcb-Sp0                                             | 6068         | 826   | 413  | 14  |
| 339          | GlcNAca1-4Galb1-3 <b>GalNAc</b> -Sp14                                                                                        | 5136         | 1110  | 555  | 22  |
| 165          | GlcNAca1-6Galb1-4GlcNAcb-Sp8                                                                                                 | 2363         | 416   | 208  | 18  |
| 386          | Fuca1-2Galb1-3 <b>GalNAca</b> 1-3(Fuca1-2)Galb1-4GlcNAcb-Sp0                                                                 | 1065         | 112   | 56   | 10  |
| 178          | GlcNAcb1-4Galb1-4GlcNAcb-Sp8                                                                                                 | 900          | 187   | 93   | 21  |
| 92           | <b>GalNAcb1-3(Fuca1-2)Galb-Sp8</b>                                                                                           | 604          | 71    | 35   | 12  |
| 377          | Galb1-3 <b>GalNAca</b> 1-3(Fuca1-2)Galb1-4GlcNAc-Sp0                                                                         | 331          | 38    | 19   | 11  |
| 206          | Mana1-6(Mana1-3)Mana1-6[Mana1-2Mana1-3]Manb1-4GlcNAcb1-4GlcNAcb-Sp12                                                         | 325          | 42    | 21   | 13  |
| 415          | <b>GalNAca1-3(Fuca1-2)Galb1-4(Fuca1-3)GlcNAcb1-3GalNAc-Sp14</b>                                                              | 221          | 38    | 19   | 17  |
| 299          | GlcAb1-3GlcNAcb-Sp8                                                                                                          | 187          | 62    | 31   | 33  |
| 203          | Mana1-2Mana1-2Mana1-3(Mana1-2Mana1-3(Mana1-2Mana1-6)Mana1-6)Manb1-4GlcNAcb1-4GlcNAcb-Sp12                                    | 162          | 40    | 20   | 25  |
