# Supplementary material
Source: PubMed Central journal article supplement (PMC2889116)

# Wang et al Figure S3

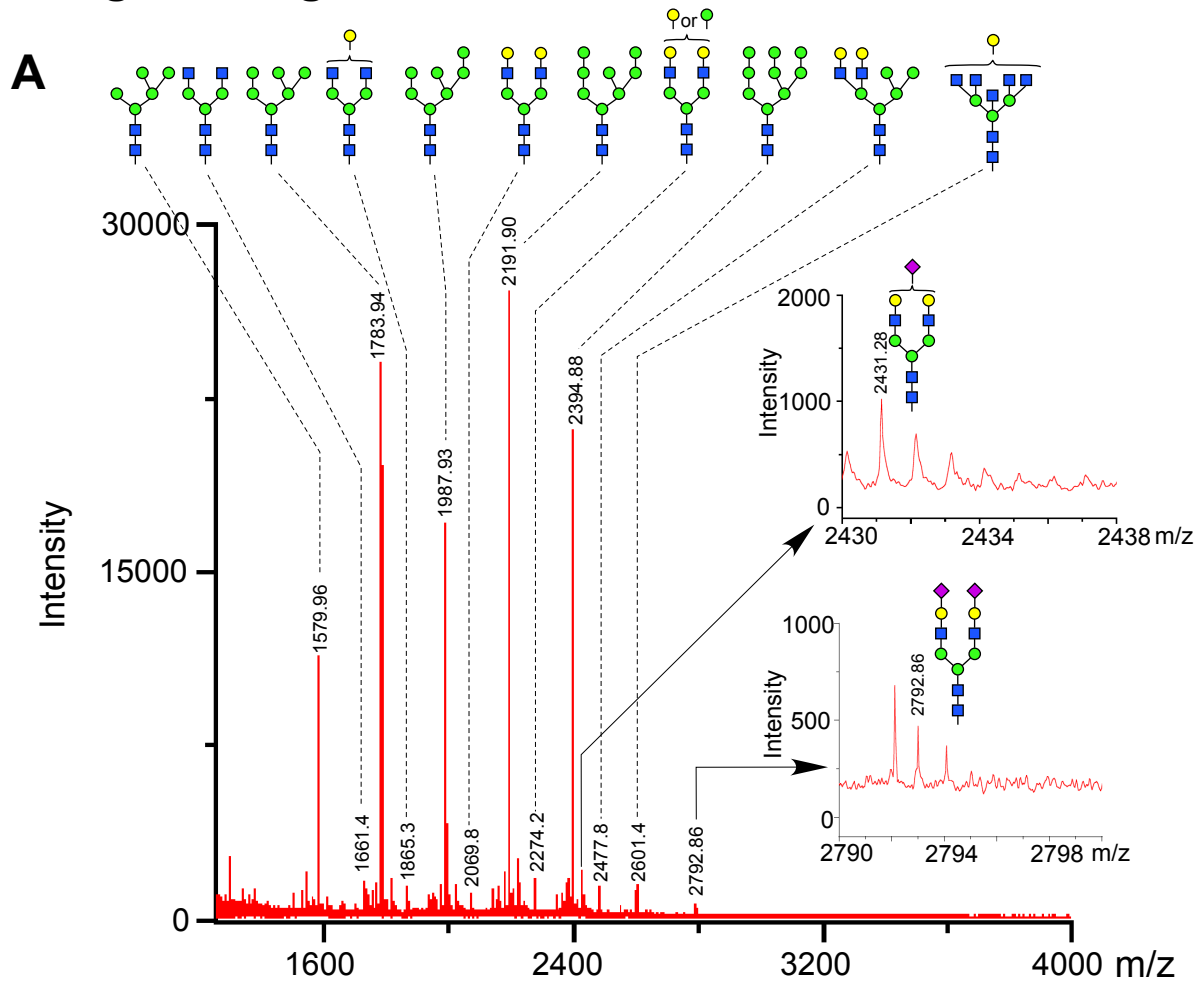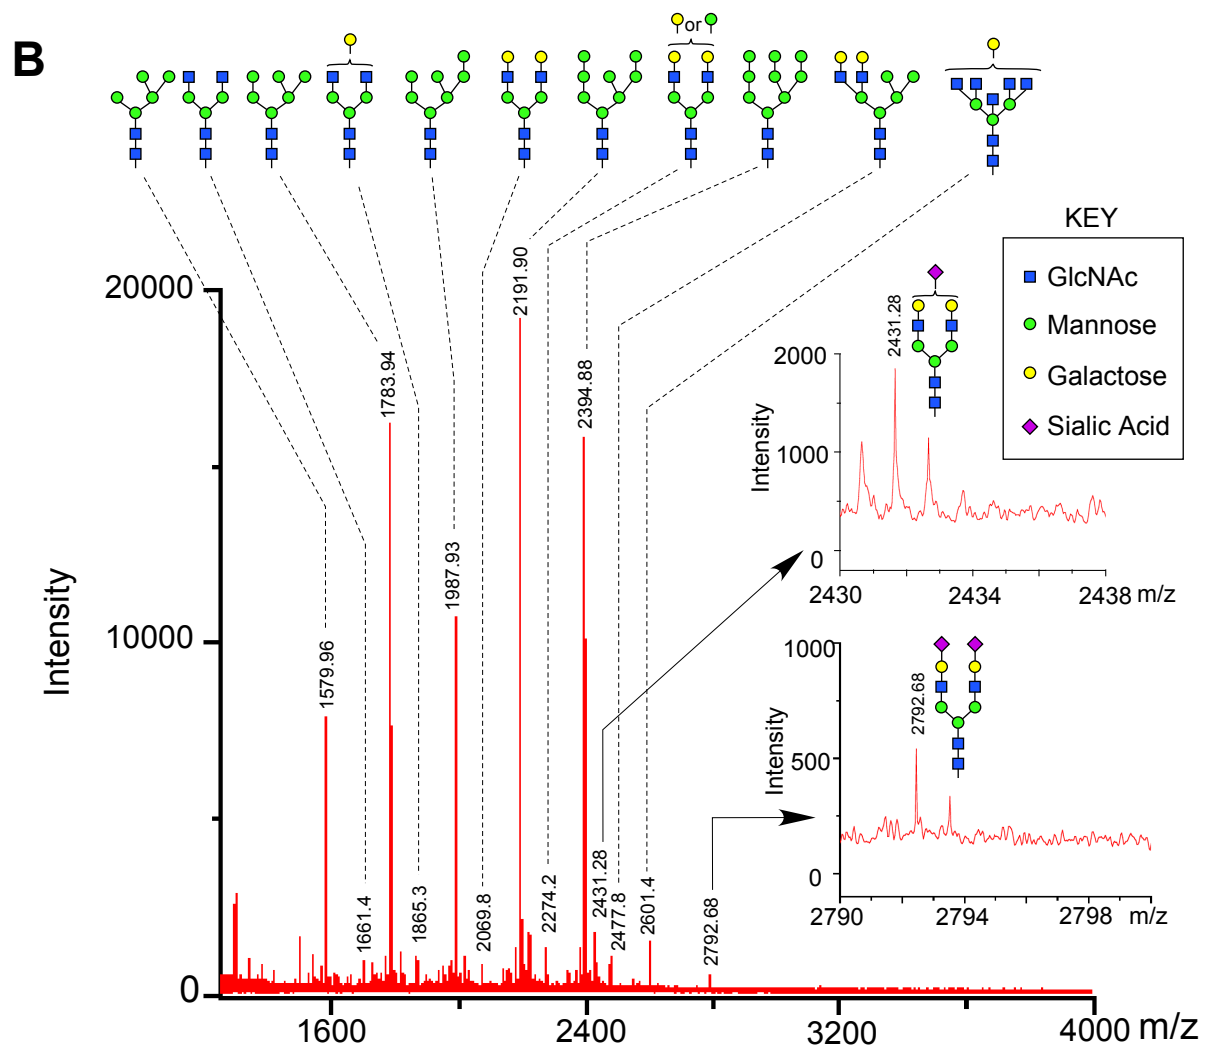

Supplement: 0914004107_sfig03.pdf [file 0914004107_sfig03.pdf]
